# Supplementary material for: Unraveling the Protein Network of Tomato Fruit in Response to Necrotrophic Phytopathogenic Rhizopus nigricans
Source: PubMed Central journal article supplement (PMC3759434; doi:10.1371/journal.pone.0073034), 2013-09-02

**Supporting Figure S1.** Annotated spectra for proteins identified by a single peptide or multiple peptides with each ion scored below the threshold. Spot numbers were consistent with those in 2-DE gel.

Spot number: 47

Spectra 11

| Rank                       | Protein Name                         | Accession No. | Protein Score | Protein Score C. I. % | Protein MW | Protein PI                       | Pep.Count                                  | Molecular Function |
|----------------------------|--------------------------------------|---------------|---------------|-----------------------|------------|----------------------------------|--------------------------------------------|--------------------|
|                            | GRAS1 [Solanum lycopersicum]         | gi 89474462   | 20            | 0                     | 60504.6    | 5.59                             | 8                                          |                    |
| <b>Protein Group</b>       |                                      |               |               |                       |            |                                  |                                            |                    |
|                            | GRAS1 protein [Solanum lycopersicum] | gi 350537697  |               |                       | 60504.6    | 5.5900<br>001525<br>8789         |                                            |                    |
| <b>Peptide Information</b> |                                      |               |               |                       |            |                                  |                                            |                    |
| Calc. Mass                 | Obsrv. Mass                          | $\pm$ da      | $\pm$ ppm     | Start Seq.            | End Seq.   | Sequence                         | C. I. % Modification                       | Rank Result Type   |
| 1008.4567                  | 1008.4742                            | 0.0175        | 17            | 84                    | 92         | SPFSPQCSR                        |                                            | Mascot             |
| 2221.1094                  | 2221.1577                            | 0.0483        | 22            | 312                   | 333        | ITGVDDDESAYARGGGLQLVG<br>K       |                                            | Mascot             |
| 2230.0552                  | 2230.261                             | 0.2058        | 92            | 488                   | 507        | LMMAGFTQCQLSPSVGETIK             | Carbamidomethyl (C)[9], Oxidation (M)[2,3] | Mascot             |
| 2426.2241                  | 2426.2668                            | 0.0427        | 18            | 486                   | 507        | LRLMMAGFTQCQLSPSVGETI<br>K       | Oxidation (M)[4]                           | Mascot             |
| 2677.2498                  | 2677.386                             | 0.1362        | 51            | 341                   | 364        | SCGVPF EFHGAALSGCEVQLE<br>NLR    | Carbamidomethyl (C)[2,16]                  | Mascot             |
| 2707.3438                  | 2707.4578                            | 0.114         | 42            | 488                   | 511        | LMMAGFTQCQLSPSVGETIKH<br>MLK     | Carbamidomethyl (C)[9]                     | Mascot             |
| 2707.3438                  | 2707.4578                            | 0.114         | 42            | 488                   | 511        | LMMAGFTQCQLSPSVGETIKH<br>MLK     | Carbamidomethyl (C)[9]                     | Mascot             |
| 2943.3018                  | 2943.6069                            | 0.3051        | 104           | 132                   | 159        | LLGPESDTDDSCSCSLNDMVS<br>KPSSVTR |                                            | Mascot             |
| 2943.3799                  | 2943.3799                            | 0.227         | 77            | 237                   | 260        | CKEPTGLELLSYMQVIFNMCPY<br>YK     | Carbamidomethyl (C)[1], Oxidation (M)[13]  | Mascot             |

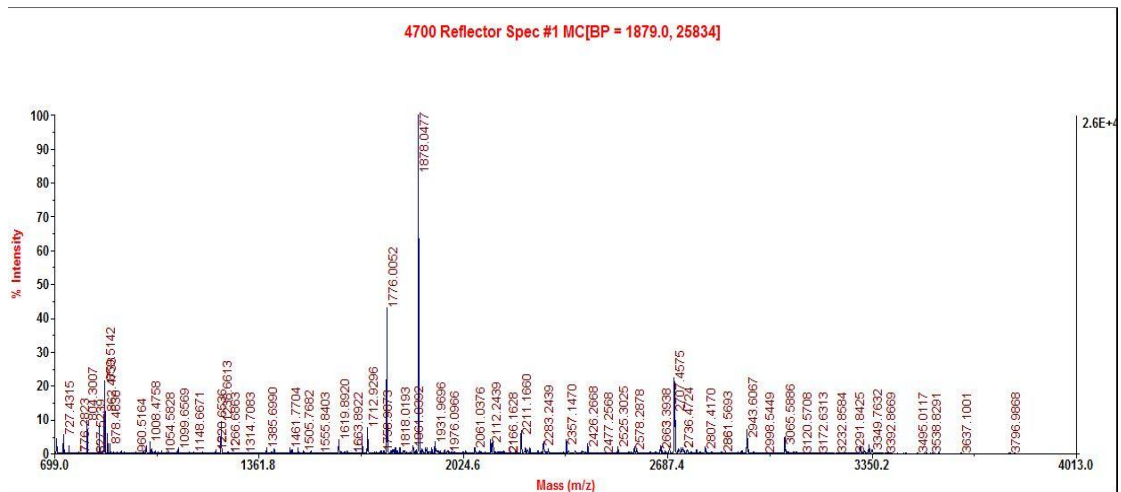

Spot number: 48

Spectra 11

| Rank                | Protein Name                                                | Accession No. | Protein Score | Protein Score C. I. % | Protein MW | Protein PI                 | Pep.Count                                | Molecular Function |
|---------------------|-------------------------------------------------------------|---------------|---------------|-----------------------|------------|----------------------------|------------------------------------------|--------------------|
|                     | methionine sulfoxide reductase A4<br>[Solanum lycopersicum] | gi 344227185  | 24            | 0                     | 28910.4    | 8.65                       | 7                                        |                    |
| Peptide Information |                                                             |               |               |                       |            |                            |                                          |                    |
| Calc. Mass          | Obsrv. Mass                                                 | ± da          | ± ppm         | Start Seq.            | End Seq.   | Sequence                   | C. I. % Modification                     | Rank Result Type   |
| 831.3777            | 831.4572                                                    | 0.0795        | 96            | 248                   | 254        | GCNDPIR                    | Carbamidomethyl (C)[2]                   | Mascot             |
| 989.5302            | 989.4126                                                    | -0.1176       | -119          | 45                    | 53         | TPSLYSPPK                  |                                          | Mascot             |
| 1663.9121           | 1663.6542                                                   | -0.2579       | -155          | 1                     | 15         | MLLKTCLPSSTIATK            | Carbamidomethyl (C)[6]                   | Mascot             |
| 1663.9121           | 1663.6542                                                   | -0.2579       | -155          | 1                     | 15         | MLLKTCLPSSTIATK            | Carbamidomethyl (C)[6]                   | Mascot             |
| 1679.9071           | 1679.6443                                                   | -0.2628       | -156          | 1                     | 15         | MLLKTCLPSSTIATK            | Carbamidomethyl (C)[6], Oxidation (M)[1] | Mascot             |
| 1679.9071           | 1679.6443                                                   | -0.2628       | -156          | 1                     | 15         | MLLKTCLPSSTIATK            | Carbamidomethyl (C)[6], Oxidation (M)[1] | Mascot             |
| 1764.8989           | 1764.6682                                                   | -0.2307       | -131          | 45                    | 59         | TPSLYSPPKMSWLNK            | Oxidation (M)[10]                        | Mascot             |
| 1981.0675           | 1980.8724                                                   | -0.1951       | -98           | 5                     | 23         | TCLPSSTIATKSP LISFSK       |                                          | Mascot             |
| 2580.2002           | 2580.1116                                                   | -0.0886       | -34           | 174                   | 195        | QGNDVGTQYRSGIYFYTPEQE<br>K |                                          | Mascot             |
| 2707.2568           | 2707.3074                                                   | 0.0506        | 19            | 152                   | 173        | ECNFDLLLDVFWDRHDP          |                                          | Mascot             |

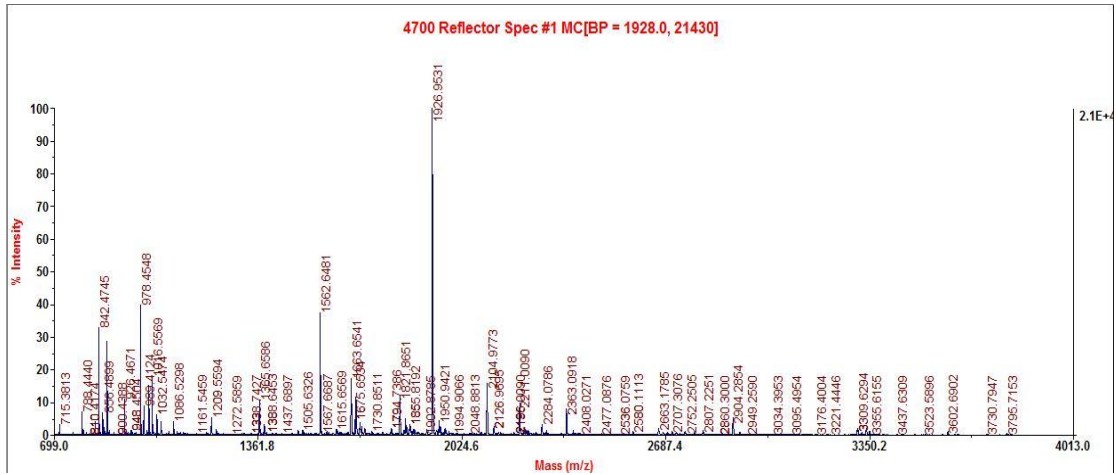

Spot number: 49

Spectra 11

| Rank | Protein Name                                       | Accession No. | Protein Score | Protein Score C. I. % | Protein MW | Protein PI | Pep.Count | Molecular Function |
|------|----------------------------------------------------|---------------|---------------|-----------------------|------------|------------|-----------|--------------------|
|      | RNA-dependent RNA polymerase [Pepino mosaic virus] | gi 310006561  | 23            | 0                     | 17231.8    | 9.12       | 6         |                    |

  

| Peptide Information |             |         |       |            |          |                    |                        |                  |
|---------------------|-------------|---------|-------|------------|----------|--------------------|------------------------|------------------|
| Calc. Mass          | Obsrv. Mass | ± da    | ± ppm | Start Seq. | End Seq. | Sequence           | C. I. % Modification   | Rank Result Type |
| 856.5614            | 856.4816    | -0.0798 | -93   | 37         | 43       | KLQNLLK            |                        | Mascot           |
| 1335.6951           | 1335.5599   | -0.1352 | -101  | 131        | 141      | LHKLHQGEAMR        | Oxidation (M)[10]      | Mascot           |
| 1368.7052           | 1238.5198   | -0.0624 | -46   | 134        | 145      | LHQGEAMRLGEK       |                        | Mascot           |
| 1812.832            | 1812.8308   | -0.0012 | -1    | 16         | 32       | QVYAGDDMALDGVVSEK  | Oxidation (M)[8]       | Mascot           |
| 1940.927            | 1940.8358   | -0.0912 | -47   | 16         | 33       | QVYAGDDMALDGVVSEKK | Oxidation (M)[8]       | Mascot           |
| 2018.9316           | 2018.8595   | -0.0721 | -36   | 56         | 73       | GDYAEFCGWFTPGGIK   | Carbamidomethyl (C)[7] | Mascot           |

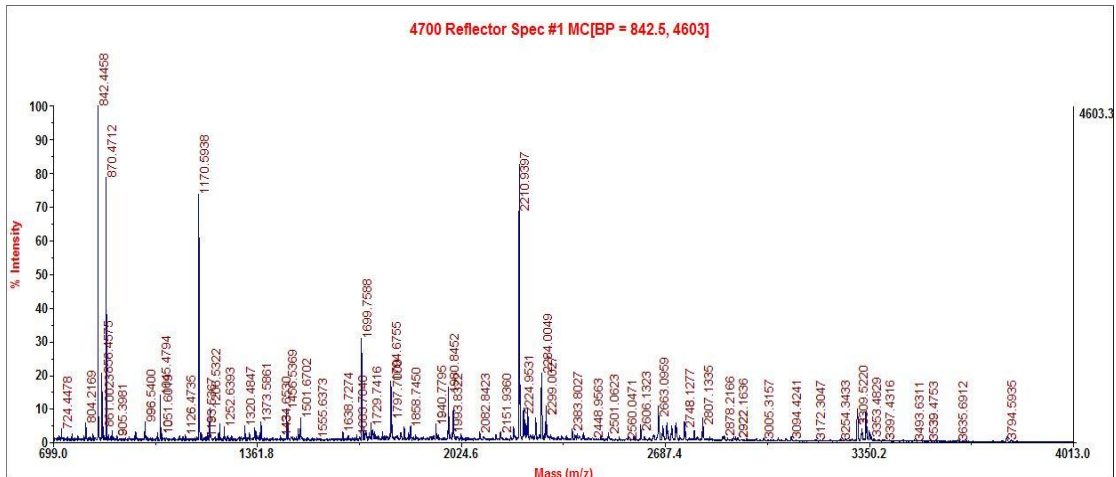

Supplement: pone.0073034.s001.pdf [file pone.0073034.s001.pdf]
